# Supplementary material for: Combined dual substituent constant and activation parameter analysis assigns a concerted mechanism to alkaline ethanolysis at phosphorus of Y-substituted phenyl diphenylphosphinates
Source: Royal Society of Chemistry journal article supplement (doi:10.1039/b712427a), 2007-01-01
Supplement: b712427a.pdf [file b712427a.pdf]

### Electronic Supplementary Information

Combined dual substituent constant and activation parameter analysis assigns a concerted mechanism to alkaline ethanolysis at phosphorus of Y-substituted phenyl diphenylphosphinates

*Ik-Hwan Um,\* Jee Eun Park, and Young-Hee Shin*

Division of Nano Sciences and Department of Chemistry, Ewha Womans University, Seoul  
120-750, Korea

Tel: 82-2-3277-2349; Fax: 82-2-3277-2844; e-mail: [ihum@ewha.ac.kr](mailto:ihum@ewha.ac.kr)

#### Table of Contents

- (1) Tables S1 – S8. Kinetic data for the reaction of Y-substituted-phenyl diphenylphosphinates (**1a-h**) with  $\text{EtO}^-\text{K}^+$  in the presence of excess 18-crown-6-ether (18C6) in anhydrous EtOH at  $25.0 \pm 0.1^\circ\text{C}$ . ( $[\text{18C6}]/[\text{EtO}^-\text{K}^+] = 5.0$ ) -----(S2–S5)
- (2) Tables S9 – S20. Summary of kinetic results for reactions of phenyl diphenylphosphinates (**1a**), 4-nitrophenyl diphenylphosphinates (**1g**), 3,4-dinitrophenyl diphenylphosphinates (**1h**) with  $\text{EtO}^-\text{K}^+$  in the presence of excess 18-crown-6-ether (18C6) in anhydrous EtOH at various temperatures. ( $[\text{18C6}]/[\text{EtO}^-\text{K}^+] = 5.0$ ) -----(S6–S11)

Table S1. Kinetic data for the reaction of phenyl diphenylphosphinate (**1a**) with EtO<sup>-</sup>K<sup>+</sup> in the presence of excess 18C6 in anhydrous EtOH at 25.0 ± 0.1°C. ([18C6]/[EtO<sup>-</sup>K<sup>+</sup>] = 5.0)

| 10 <sup>3</sup> [EtO <sup>-</sup> K <sup>+</sup> ]/ M | 10 <sup>4</sup> <i>k</i> <sub>obsd</sub> / s <sup>-1</sup> |
|-------------------------------------------------------|------------------------------------------------------------|
| 4.37                                                  | 0.253                                                      |
| 9.83                                                  | 0.631                                                      |
| 16.9                                                  | 1.13                                                       |
| 26.2                                                  | 1.77                                                       |
| 46.2                                                  | 3.47                                                       |
| 59.0                                                  | 4.27                                                       |

$$k_{\text{EtO}^-} = (7.51 \pm 0.16) \times 10^{-3} \text{ M}^{-1} \text{ s}^{-1}$$
$$R^2 = 0.9990$$

Table S2. Kinetic data for the reaction of 4-chlorophenyl diphenylphosphinate (**1b**) with EtO<sup>-</sup>K<sup>+</sup> in the presence of excess 18C6 in anhydrous EtOH at 25.0 ± 0.1°C. ([18C6]/[EtO<sup>-</sup>K<sup>+</sup>] = 5.0)

| 10 <sup>3</sup> [EtO <sup>-</sup> K <sup>+</sup> ]/M | 10 <sup>3</sup> <i>k</i> <sub>obsd</sub> /s <sup>-1</sup> |
|------------------------------------------------------|-----------------------------------------------------------|
| 11.7                                                 | 0.493                                                     |
| 19.3                                                 | 0.767                                                     |
| 26.8                                                 | 1.07                                                      |
| 34.2                                                 | 1.41                                                      |
| 44.4                                                 | 1.85                                                      |

$$k_{\text{EtO}^-} = (4.19 \pm 0.10) \times 10^{-2} \text{ M}^{-1} \text{ s}^{-1}$$
$$R^2 = 0.9991$$

Table S3. Kinetic data for the reaction of 3-acetylphenyl diphenylphosphinate (**1c**) with EtO<sup>-</sup>K<sup>+</sup> in the presence of excess 18C6 in anhydrous EtOH at 25.0 ± 0.1°C. ([18C6]/[EtO<sup>-</sup>K<sup>+</sup>] = 5.0)

| 10 <sup>3</sup> [EtO <sup>-</sup> K <sup>+</sup> ]/M | 10 <sup>3</sup> <i>k</i> <sub>obsd</sub> /s <sup>-1</sup> |
|------------------------------------------------------|-----------------------------------------------------------|
| 5.05                                                 | 0.307                                                     |
| 15.9                                                 | 1.09                                                      |
| 24.7                                                 | 1.58                                                      |
| 34.2                                                 | 2.19                                                      |
| 44.4                                                 | 2.86                                                      |

$$k_{\text{EtO}^-} = (6.41 \pm 0.13) \times 10^{-2} \text{ M}^{-1} \text{ s}^{-1}$$
$$R^2 = 0.9993$$

Table S4. Kinetic data for the reaction of 4-acetylphenyl diphenylphosphinate (**1d**) with EtO<sup>-</sup>K<sup>+</sup> in the presence of excess 18C6 in anhydrous EtOH at 25.0 ± 0.1°C. ([18C6]/[EtO<sup>-</sup>K<sup>+</sup>] = 5.0)

| 10 <sup>3</sup> [EtO <sup>-</sup> K <sup>+</sup> ]/M | 10 <sup>3</sup> <i>k</i> <sub>obsd</sub> /s <sup>-1</sup> |
|------------------------------------------------------|-----------------------------------------------------------|
| 4.55                                                 | 0.711                                                     |
| 11.5                                                 | 1.71                                                      |
| 20.0                                                 | 3.14                                                      |
| 30.8                                                 | 4.98                                                      |
| 40.0                                                 | 6.72                                                      |

$$k_{\text{EtO}^-} = (1.70 \pm 0.04) \times 10^{-1} \text{ M}^{-1} \text{ s}^{-1}$$
$$R^2 = 0.9991$$

Table S5. Kinetic data for the reaction of 4-cyanophenyl diphenylphosphinate (**1e**) with EtO<sup>-</sup>K<sup>+</sup> in the presence of excess 18C6 in anhydrous EtOH at 25.0 ± 0.1°C. ([18C6]/[EtO<sup>-</sup>K<sup>+</sup>] = 5.0)

| 10 <sup>3</sup> [EtO <sup>-</sup> K <sup>+</sup> ]/M | 10 <sup>3</sup> <i>k</i> <sub>obsd</sub> /s <sup>-1</sup> |
|------------------------------------------------------|-----------------------------------------------------------|
| 12.8                                                 | 6.64                                                      |
| 19.3                                                 | 10.0                                                      |
| 27.8                                                 | 14.7                                                      |
| 35.7                                                 | 19.0                                                      |
| 44.4                                                 | 24.5                                                      |

$$k_{\text{EtO}^-} = (5.63 \pm 0.12) \times 10^{-1} \text{ M}^{-1} \text{ s}^{-1}$$
$$R^2 = 0.9993$$

Table S6. Kinetic data for the reaction of 4-formylphenyl diphenylphosphinate (**1f**) with EtO<sup>-</sup>K<sup>+</sup> in the presence of excess 18C6 in anhydrous EtOH at 25.0 ± 0.1°C. ([18C6]/[EtO<sup>-</sup>K<sup>+</sup>] = 5.0)

| 10 <sup>3</sup> [EtO <sup>-</sup> K <sup>+</sup> ]/M | 10 <sup>3</sup> <i>k</i> <sub>obsd</sub> /s <sup>-1</sup> |
|------------------------------------------------------|-----------------------------------------------------------|
| 10.5                                                 | 2.62                                                      |
| 25.0                                                 | 6.15                                                      |
| 29.2                                                 | 7.50                                                      |
| 40.0                                                 | 10.2                                                      |
| 50.0                                                 | 13.1                                                      |

$$k_{\text{EtO}^-} = (2.65 \pm 0.06) \times 10^{-1} \text{ M}^{-1} \text{ s}^{-1}$$
$$R^2 = 0.9993$$

Table S7. Kinetic data for the reaction of 4-nitrophenyl diphenylphosphinate (**1g**) with EtO<sup>-</sup> K<sup>+</sup> in the presence of excess 18C6 in anhydrous EtOH at 25.0 ± 0.1 °C. ([18C6]/[EtO<sup>-</sup> K<sup>+</sup>] = 5.0)

| 10 <sup>3</sup> [EtO <sup>-</sup> K <sup>+</sup> ]/M | 10 <sup>3</sup> k <sub>obsd</sub> /s <sup>-1</sup> |
|------------------------------------------------------|----------------------------------------------------|
| 4.55                                                 | 4.45                                               |
| 8.33                                                 | 8.48                                               |
| 11.5                                                 | 12.1                                               |
| 14.3                                                 | 15.0                                               |
| 16.7                                                 | 17.7                                               |

$$k_{\text{EtO}^-} = 1.09 \pm 0.01 \text{ M}^{-1} \text{ s}^{-1}$$

$$R^2 = 0.9999$$

Table S8. Kinetic data for the reaction of 3,4-dinitrophenyl diphenylphosphinate (**1h**) with EtO<sup>-</sup> K<sup>+</sup> in the presence of excess 18C6 in anhydrous EtOH at 25.0 ± 0.1 °C. ([18C6]/[EtO<sup>-</sup> K<sup>+</sup>] = 5.0)

| 10 <sup>3</sup> [EtO <sup>-</sup> K <sup>+</sup> ]/M | 10 <sup>3</sup> k <sub>obsd</sub> /s <sup>-1</sup> |
|------------------------------------------------------|----------------------------------------------------|
| 0.495                                                | 9.30                                               |
| 0.980                                                | 19.8                                               |
| 1.46                                                 | 30.0                                               |
| 1.92                                                 | 40.0                                               |
| 2.38                                                 | 49.6                                               |

$$k_{\text{EtO}^-} = 21.4 \pm 0.1 \text{ M}^{-1} \text{ s}^{-1}$$

$$R^2 = 0.9999$$

Table S9. Kinetic data for the reaction of phenyl diphenylphosphinate (**1a**) with EtO<sup>-</sup>K<sup>+</sup> in the presence of excess 18C6 in anhydrous EtOH at 15.0 ± 0.1°C. ([18C6]/[EtO<sup>-</sup>K<sup>+</sup>] = 5.0)

| 10 <sup>3</sup> [EtO <sup>-</sup> K <sup>+</sup> ]/M | 10 <sup>4</sup> <i>k</i> <sub>obsd</sub> /s <sup>-1</sup> |
|------------------------------------------------------|-----------------------------------------------------------|
| 9.83                                                 | 0.314                                                     |
| 16.9                                                 | 0.544                                                     |
| 26.2                                                 | 0.909                                                     |
| 36.3                                                 | 1.27                                                      |
| 46.2                                                 | 1.69                                                      |

$$k_{\text{EtO}^-} = (3.78 \pm 0.08) \times 10^{-3} \text{ M}^{-1} \text{ s}^{-1}$$
$$R^2 = 0.9992$$

Table S10. Kinetic data for the reaction of phenyl diphenylphosphinate (**1a**) with EtO<sup>-</sup>K<sup>+</sup> in the presence of excess 18C6 in anhydrous EtOH at 20.0 ± 0.1°C. ([18C6]/[EtO<sup>-</sup>K<sup>+</sup>] = 5.0)

| 10 <sup>3</sup> [EtO <sup>-</sup> K <sup>+</sup> ]/M | 10 <sup>3</sup> <i>k</i> <sub>obsd</sub> /s <sup>-1</sup> |
|------------------------------------------------------|-----------------------------------------------------------|
| 16.9                                                 | 0.080                                                     |
| 26.2                                                 | 0.128                                                     |
| 36.3                                                 | 0.187                                                     |
| 46.2                                                 | 0.241                                                     |
| 59.0                                                 | 0.325                                                     |

$$k_{\text{EtO}^-} = (5.80 \pm 0.15) \times 10^{-3} \text{ M}^{-1} \text{ s}^{-1}$$
$$R^2 = 0.9990$$

Table S11. Kinetic data for the reaction of phenyl diphenylphosphinate (**1a**) with EtO<sup>-</sup>K<sup>+</sup> in the presence of excess 18C6 in anhydrous EtOH at 35.0 ± 0.1°C. ([18C6]/[EtO<sup>-</sup>K<sup>+</sup>] = 5.0)

| $10^3 [\text{EtO}^-\text{K}^+]/\text{M}$ | $10^4 k_{\text{obsd}}/\text{s}^{-1}$ |
|------------------------------------------|--------------------------------------|
| 4.37                                     | 0.517                                |
| 9.83                                     | 1.20                                 |
| 16.9                                     | 2.16                                 |
| 26.2                                     | 3.60                                 |
| 36.3                                     | 4.94                                 |

$$k_{\text{EtO}^-} = (1.41 \pm 0.03) \times 10^{-2} \text{M}^{-1} \text{s}^{-1}$$
$$R^2 = 0.9995$$

Table S12. Kinetic data for the reaction of phenyl diphenylphosphinate (**1a**) with EtO<sup>-</sup>K<sup>+</sup> in the presence of excess 18C6 in anhydrous EtOH at 45.0 ± 0.1°C. ([18C6]/[EtO<sup>-</sup>K<sup>+</sup>] = 5.0)

| $10^3 [\text{EtO}^-\text{K}^+]/\text{M}$ | $10^4 k_{\text{obsd}}/\text{s}^{-1}$ |
|------------------------------------------|--------------------------------------|
| 4.37                                     | 0.873                                |
| 9.83                                     | 2.24                                 |
| 16.9                                     | 4.04                                 |
| 26.2                                     | 6.99                                 |
| 46.2                                     | 12.3                                 |
| 59.0                                     | 16.5                                 |

$$k_{\text{EtO}^-} = (2.85 \pm 0.05) \times 10^{-2} \text{M}^{-1} \text{s}^{-1}$$
$$R^2 = 0.9993$$

Table S13. Kinetic data for the reaction of 4-nitrophenyl diphenylphosphinate (**1g**) with EtO<sup>-</sup>K<sup>+</sup> in the presence of excess 18C6 in anhydrous EtOH at 15.0 ± 0.1°C. ([18C6]/[EtO<sup>-</sup>K<sup>+</sup>] = 5.0)

| 10 <sup>3</sup> [EtO <sup>-</sup> K <sup>+</sup> ]/M | 10 <sup>3</sup> <i>k</i> <sub>obsd</sub> /s <sup>-1</sup> |
|------------------------------------------------------|-----------------------------------------------------------|
| 5.36                                                 | 2.78                                                      |
| 9.83                                                 | 5.30                                                      |
| 13.6                                                 | 7.58                                                      |
| 16.9                                                 | 9.78                                                      |
| 19.7                                                 | 11.1                                                      |

$$k_{\text{EtO}^-} = (5.91 \pm 0.14) \times 10^{-1} \text{ M}^{-1} \text{ s}^{-1}$$
$$R^2 = 0.9992$$

Table S14. Kinetic data for the reaction of 4-nitrophenyl diphenylphosphinate (**1g**) with EtO<sup>-</sup>K<sup>+</sup> in the presence of excess 18C6 in anhydrous EtOH at 20.0 ± 0.1°C. ([18C6]/[EtO<sup>-</sup>K<sup>+</sup>] = 5.0)

| 10 <sup>3</sup> [EtO <sup>-</sup> K <sup>+</sup> ]/M | 10 <sup>3</sup> <i>k</i> <sub>obsd</sub> /s <sup>-1</sup> |
|------------------------------------------------------|-----------------------------------------------------------|
| 5.36                                                 | 3.84                                                      |
| 9.83                                                 | 7.23                                                      |
| 13.6                                                 | 10.7                                                      |
| 16.9                                                 | 13.6                                                      |
| 19.7                                                 | 15.7                                                      |

$$k_{\text{EtO}^-} = (8.41 \pm 0.17) \times 10^{-1} \text{ M}^{-1} \text{ s}^{-1}$$
$$R^2 = 0.9993$$



Table S15. Kinetic data for the reaction of 4-nitrophenyl diphenylphosphinate (**1g**) with EtO<sup>-</sup>K<sup>+</sup> in the presence of excess 18C6 in anhydrous EtOH at 35.0 ± 0.1°C. ([18C6]/[EtO<sup>-</sup>K<sup>+</sup>] = 5.0)

| 10 <sup>3</sup> [EtO <sup>-</sup> K <sup>+</sup> ]/M | 10 <sup>3</sup> <i>k</i> <sub>obsd</sub> /s <sup>-1</sup> |
|------------------------------------------------------|-----------------------------------------------------------|
| 5.36                                                 | 9.26                                                      |
| 9.83                                                 | 16.8                                                      |
| 13.6                                                 | 23.8                                                      |
| 16.9                                                 | 28.3                                                      |
| 19.7                                                 | 33.8                                                      |

$$k_{\text{EtO}^-} = 1.69 \pm 0.04 \text{ M}^{-1} \text{ s}^{-1}$$
$$R^2 = 0.9991$$

Table S16. Kinetic data for the reaction of 4-nitrophenyl diphenylphosphinate (**1g**) with EtO<sup>-</sup>K<sup>+</sup> in the presence of excess 18C6 in anhydrous EtOH at 45.0 ± 0.1°C. ([18C6]/[EtO<sup>-</sup>K<sup>+</sup>] = 5.0)

| 10 <sup>3</sup> [EtO <sup>-</sup> K <sup>+</sup> ]/M | 10 <sup>3</sup> <i>k</i> <sub>obsd</sub> /s <sup>-1</sup> |
|------------------------------------------------------|-----------------------------------------------------------|
| 5.36                                                 | 14.3                                                      |
| 9.83                                                 | 26.3                                                      |
| 13.6                                                 | 37.1                                                      |
| 16.9                                                 | 45.6                                                      |
| 19.7                                                 | 53.4                                                      |

$$k_{\text{EtO}^-} = 2.73 \pm 0.02 \text{ M}^{-1} \text{ s}^{-1}$$
$$R^2 = 0.9999$$

Table S17. Kinetic data for the reaction of 3,4-dinitrophenyl diphenylphosphinate (**1h**) with EtO<sup>-</sup>K<sup>+</sup> in the presence of excess 18C6 in anhydrous EtOH at 15.0 ± 0.1°C. ([18C6]/[EtO<sup>-</sup>K<sup>+</sup>] = 5.0)

| 10 <sup>3</sup> [EtO <sup>-</sup> K <sup>+</sup> ]/M | 10 <sup>3</sup> <i>k</i> <sub>obsd</sub> /s <sup>-1</sup> |
|------------------------------------------------------|-----------------------------------------------------------|
| 0.468                                                | 5.06                                                      |
| 0.929                                                | 11.4                                                      |
| 1.38                                                 | 18.9                                                      |
| 1.83                                                 | 25.7                                                      |
| 2.27                                                 | 31.2                                                      |

$$k_{\text{EtO}^-} = 14.8 \pm 0.4 \text{ M}^{-1} \text{ s}^{-1}$$
$$R^2 = 0.9990$$

Table S18. Kinetic data for the reaction of 3,4-dinitrophenyl diphenylphosphinate (**1h**) with EtO<sup>-</sup>K<sup>+</sup> in the presence of excess 18C6 in anhydrous EtOH at 20.0 ± 0.1°C. ([18C6]/[EtO<sup>-</sup>K<sup>+</sup>] = 5.0)

| 10 <sup>3</sup> [EtO <sup>-</sup> K <sup>+</sup> ]/M | 10 <sup>3</sup> <i>k</i> <sub>obsd</sub> /s <sup>-1</sup> |
|------------------------------------------------------|-----------------------------------------------------------|
| 0.584                                                | 8.38                                                      |
| 1.16                                                 | 18.7                                                      |
| 1.72                                                 | 27.7                                                      |
| 2.27                                                 | 37.8                                                      |
| 2.81                                                 | 47.9                                                      |

$$k_{\text{EtO}^-} = 17.6 \pm 0.2 \text{ M}^{-1} \text{ s}^{-1}$$
$$R^2 = 0.9997$$

Table S19. Kinetic data for the reaction of 3,4-dinitrophenyl diphenylphosphinate (**1h**) with EtO<sup>-</sup>K<sup>+</sup> in the presence of excess 18C6 in anhydrous EtOH at 35.0 ± 0.1°C. ([18C6]/[EtO<sup>-</sup>K<sup>+</sup>] = 5.0)

| 10 <sup>3</sup> [EtO <sup>-</sup> K <sup>+</sup> ]/M | 10 <sup>3</sup> k <sub>obsd</sub> /s <sup>-1</sup> |
|------------------------------------------------------|----------------------------------------------------|
| 0.584                                                | 17.7                                               |
| 1.16                                                 | 37.4                                               |
| 1.72                                                 | 56.5                                               |
| 2.27                                                 | 72.0                                               |
| 2.81                                                 | 91.7                                               |

$$k_{\text{EtO}^-} = 32.8 \pm 0.6 \text{ M}^{-1} \text{ s}^{-1}$$
$$R^2 = 0.9994$$

Table S20. Kinetic data for the reaction of 3,4-dinitrophenyl diphenylphosphinate (**1h**) with EtO<sup>-</sup>K<sup>+</sup> in the presence of excess 18C6 in anhydrous EtOH at 45.0 ± 0.1°C. ([18C6]/[EtO<sup>-</sup>K<sup>+</sup>] = 5.0)

| 10 <sup>3</sup> [EtO <sup>-</sup> K <sup>+</sup> ]/M | 10 <sup>3</sup> k <sub>obsd</sub> /s <sup>-1</sup> |
|------------------------------------------------------|----------------------------------------------------|
| 0.468                                                | 18.4                                               |
| 0.929                                                | 41.0                                               |
| 1.38                                                 | 61.4                                               |
| 1.83                                                 | 82.4                                               |
| 2.27                                                 | 103                                                |

$$k_{\text{EtO}^-} = 46.8 \pm 0.3 \text{ M}^{-1} \text{ s}^{-1}$$
$$R^2 = 0.9999$$
